# Supplementary material for: An amphiphilic-ligand-modified gold nanoflower probe for enhancing the stability of lateral flow immunoassays in dried distillers grains
Source: Royal Society of Chemistry journal article supplement (doi:10.1039/c9ra06690j), 2019-01-01
Supplement: c9ra06690j1.pdf [file c9ra06690j1.pdf]

## Supporting information for

### **An amphiphilic-ligand-modified gold nanoflower probe for enhancing the stability of lateral flow immunoassays in dried distillers' grains**

Tongtong Ma<sup>a,b</sup>, Hong Duan<sup>a,b</sup>, Wenjing Zhang<sup>a,b</sup>, Yanna Shao<sup>a,b</sup>, Liangwen Hao<sup>a,b</sup>, Yuankui Leng<sup>\*a,c</sup>, Xiaolin Huang<sup>a,c</sup>, Yonghua Xiong<sup>\*a,b</sup>

<sup>a</sup> State Key Laboratory of Food Science and Technology, Nanchang University, Nanchang 330047, P. R. China;

<sup>b</sup> Jiangxi-OAI Joint Research Institute, Nanchang University, Nanchang 330047, P. R. China;

<sup>c</sup> School of food science and technology, Nanchang University, Nanchang 330047, P. R. China;

\*Correspondence to:

Dr. Yuankui Leng and Dr. Yonghua Xiong

State Key Laboratory of Food Science and Technology, and Jiangxi-OAI Joint Research Institute, Nanchang University, Nanchang 330047, P.R. China

E-mail: yuankuilengxq@163.com ; yhxiongchen@163.com

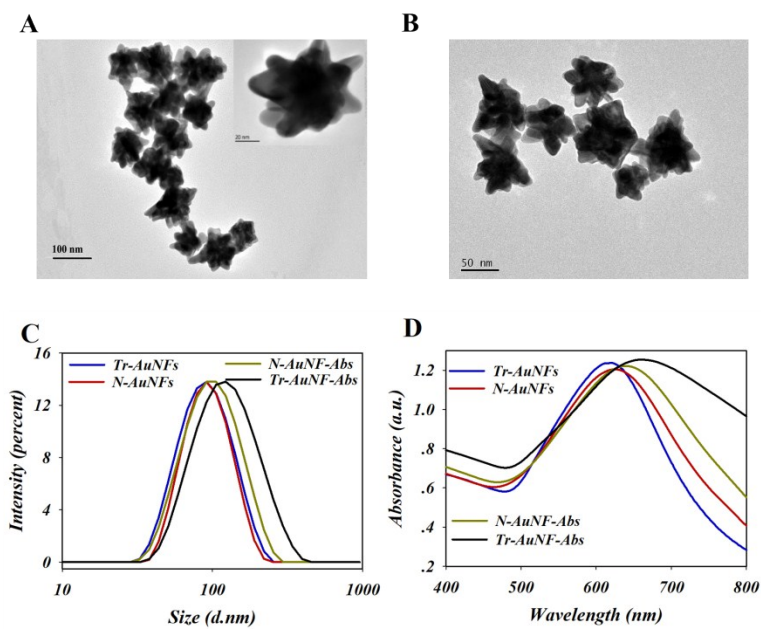

**Fig. S1.** Characterization of the 80 nm Tr-AuNFs, N-AuNFs, N-AuNF-Abs, and Tr-AuNF-Abs: (A) TEM images of the 80 nm Tr-AuNFs, (B) TEM image of the 80 nm N-AuNFs. (C) DLS analysis and (D) UV-Vis spectra of the 80 nm Tr-AuNFs, N-AuNFs, N-AuNF-Abs, and Tr-AuNF-Abs.

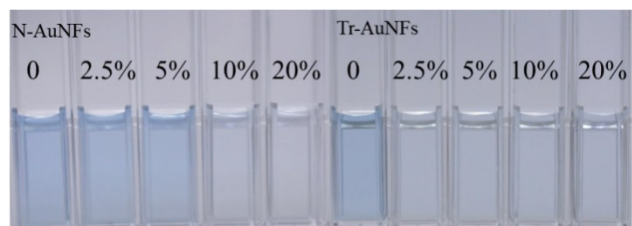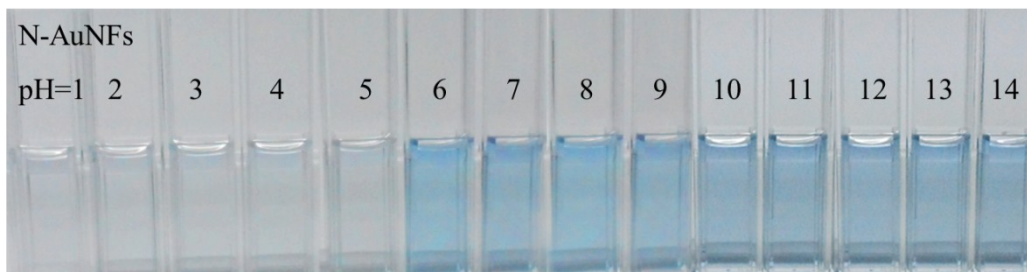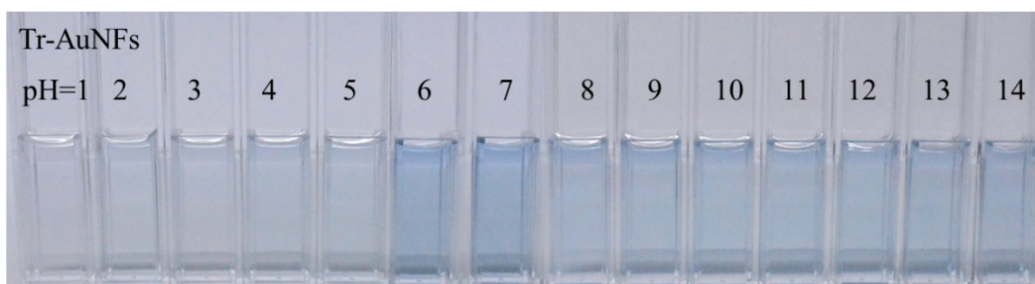

**Fig. S2.** Real photos of both the Tr-AuNFs and N-AuNFs treated with different concentrations of NaCl (0-20 wt.%) and different pH values (1-14)

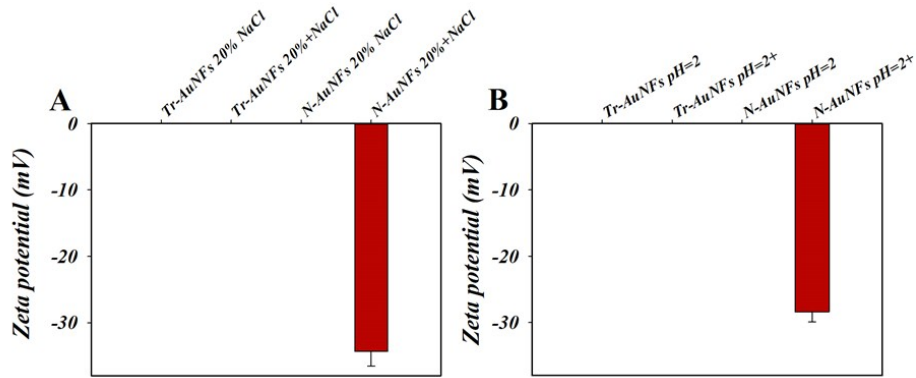

**Fig. S3.** (A) Zeta potentials of N-AuNFs and Tr-AuNF treated with 20% of NaCl solution (wt.%); (B) Zeta potential of N-AuNFs and Tr-AuNFs treated with a strongly acidic solution (pH = 2); N-AuNFs 20% NaCl and Tr-AuNFs 20% NaCl represent that N-AuNFs and Tr-AuNFs dissolve in 20% of NaCl solution (wt.%); N-AuNFs 20%+NaCl and Tr-AuNFs 20%+NaCl represent that the aggregated N-AuNFs and aggregated Tr-AuNFs recovered by centrifugation were resuspended in pure water; N-AuNFs pH=2 and Tr-AuNFs pH=2 represent that N-AuNFs and Tr-AuNFs dissolve in a strongly acidic solution (pH = 2); N-AuNFs pH=2+ and Tr-AuNFs pH=2+ represent that the aggregated N-AuNFs and Tr-AuNFs recovered by centrifugation were resuspended in pure water.

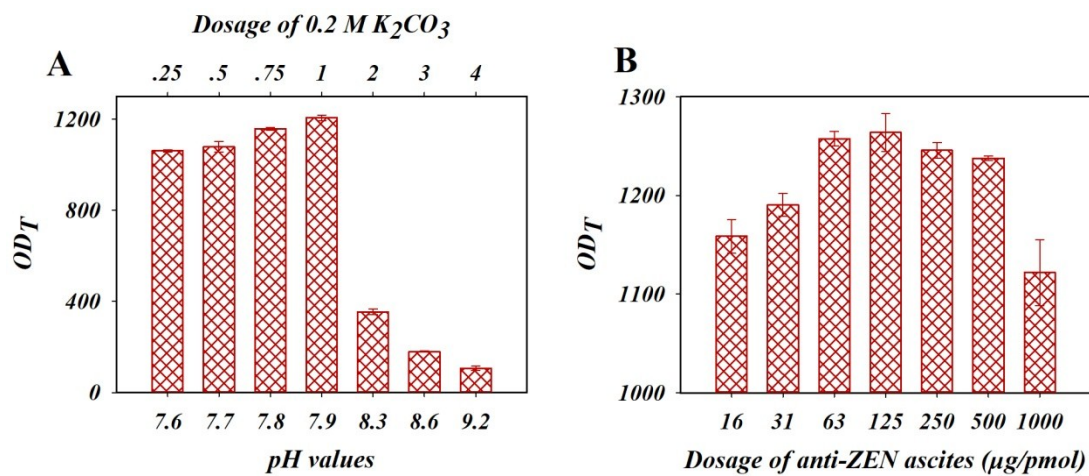

**Fig. S4.** Parameter optimization for the preparation of Tr-AuNF-Abs. OD<sub>T</sub> values of test strips based on Tr-AuNF-Abs prepared using different (A) pH values, which were adjusted by adding 0.2 M K<sub>2</sub>CO<sub>3</sub> to the Tr-AuNF solution (20 pM), and (B) dosages of anti-ZEN ascites.

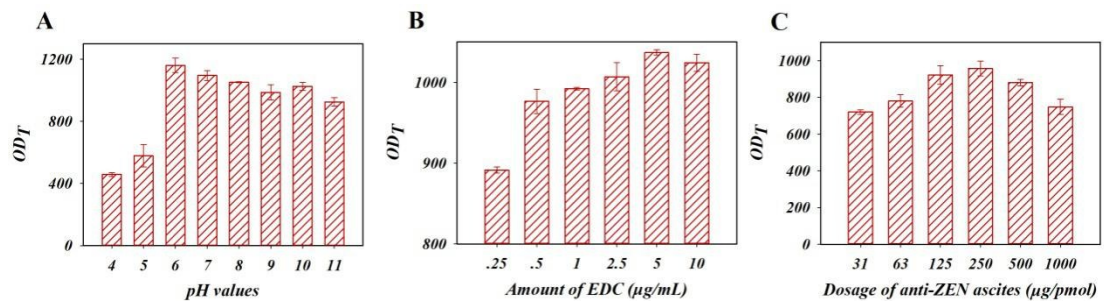

**Fig. S5.** Parameter optimization for the preparation of N-AuNF-Abs. OD<sub>T</sub> values of test strips based on Tr-AuNF-Abs prepared using different (A) pH values, (B) amounts of EDC, and (C) dosages of anti-ZEN ascites.

**Table S1** Optimization of the parameters of the (A) N-AuNF-Abs- and (B) Tr-AuNF-Abs-based ZEN-LFA strips.

**A**

| No. | N-AuNF-Abs on conjugate pad (fmol/cm) | ZEN-BSA on T line ( $\mu\text{g}/\text{cm}$ ) | Negative Sample |                 | 5 ng/ml ZEN Sample           |
|-----|---------------------------------------|-----------------------------------------------|-----------------|-----------------|------------------------------|
|     |                                       |                                               | OD <sub>T</sub> | OD <sub>C</sub> | Competitive inhibition ratio |
| 1   | 1                                     | 0.37                                          | 443 $\pm$ 24    | 325 $\pm$ 21    | 41.6                         |
| 2   | 1                                     | 0.74                                          | 536 $\pm$ 99    | 137 $\pm$ 23    | 52.5                         |
| 3*  | 1                                     | 1.48                                          | 618 $\pm$ 80    | 108 $\pm$ 8     | 63.7                         |
| 4   | 1.5                                   | 0.37                                          | 578 $\pm$ 51    | 430 $\pm$ 28    | 33.5                         |
| 5   | 1.5                                   | 0.74                                          | 658 $\pm$ 51    | 173 $\pm$ 25    | 42.7                         |
| 6   | 1.5                                   | 1.48                                          | 831 $\pm$ 94    | 149 $\pm$ 21    | 48.2                         |
| 7   | 2                                     | 0.37                                          | 653 $\pm$ 119   | 520 $\pm$ 77    | 28.5                         |
| 8   | 2                                     | 0.74                                          | 690 $\pm$ 94    | 193 $\pm$ 38    | 42.7                         |
| 9   | 2                                     | 1.48                                          | 1016 $\pm$ 28   | 180 $\pm$ 36    | 51.7                         |

**B**

| No. | Tr-AuNF-Abs on conjugate pad (fmol/cm) | ZEN-BSA on T line ( $\mu\text{g}/\text{cm}$ ) | Negative Sample |                 | 5 ng/ml ZEN Sample           |
|-----|----------------------------------------|-----------------------------------------------|-----------------|-----------------|------------------------------|
|     |                                        |                                               | OD <sub>T</sub> | OD <sub>C</sub> | Competitive inhibition ratio |
| 1*  | 3                                      | 0.37                                          | 547 $\pm$ 39    | 248 $\pm$ 25    | 55.6                         |
| 2   | 3                                      | 0.74                                          | 566 $\pm$ 29    | 136 $\pm$ 34    | 48.9                         |
| 3   | 3                                      | 1.48                                          | 752 $\pm$ 31    | 59 $\pm$ 7      | 39                           |
| 4   | 3.5                                    | 0.37                                          | 541 $\pm$ 16    | 299 $\pm$ 32    | 30.5                         |
| 5   | 3.5                                    | 0.74                                          | 651 $\pm$ 58    | 123 $\pm$ 10    | 27.1                         |
| 6   | 3.5                                    | 1.48                                          | 738 $\pm$ 13    | 59 $\pm$ 21     | 53.4                         |
| 7   | 4                                      | 0.37                                          | 580 $\pm$ 14    | 314 $\pm$ 38    | 33.2                         |
| 8   | 4                                      | 0.74                                          | 674 $\pm$ 34    | 154 $\pm$ 27    | 27.8                         |
| 9   | 4                                      | 1.48                                          | 844 $\pm$ 4     | 756 $\pm$ 13    | 17                           |

\*: represents the optimum parameters for the preparation of ZEN-LFA strip

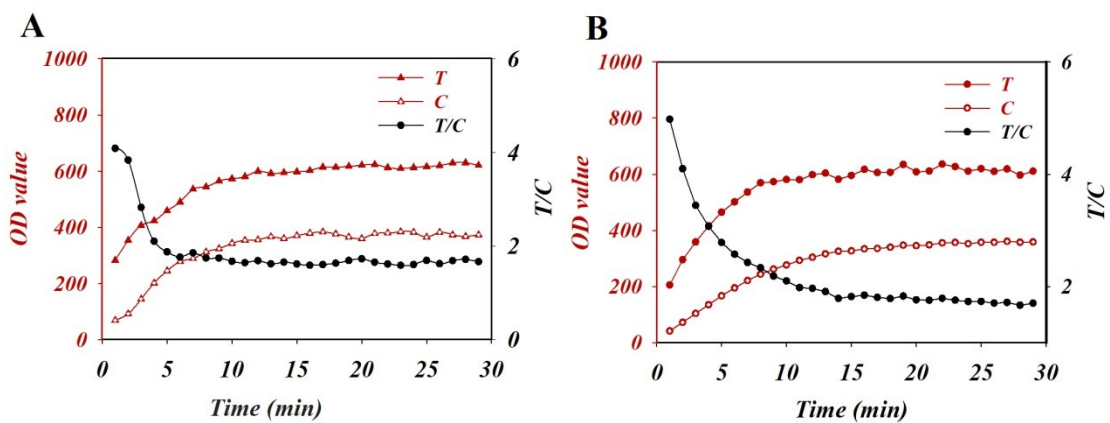

**Fig. S6.** Immunoreaction dynamic curves for the (A) N-AuNF-Abs- and (B) Tr-AuNF-Abs-based ZEN-LFA strips.

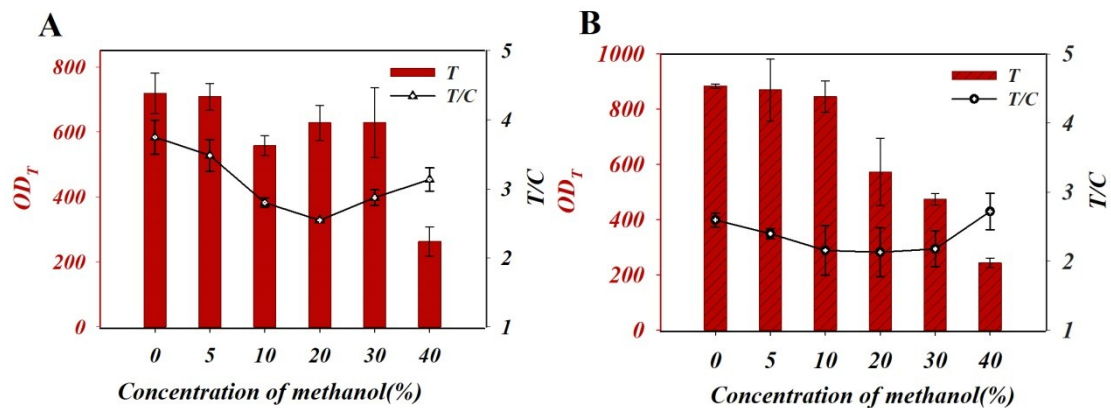

**Fig. S7.** Effects of the methanol content on the detection performance of the (A) N-AuNF-Abs- and (B) Tr-AuNF-Abs-based ZEN-LFA strips.



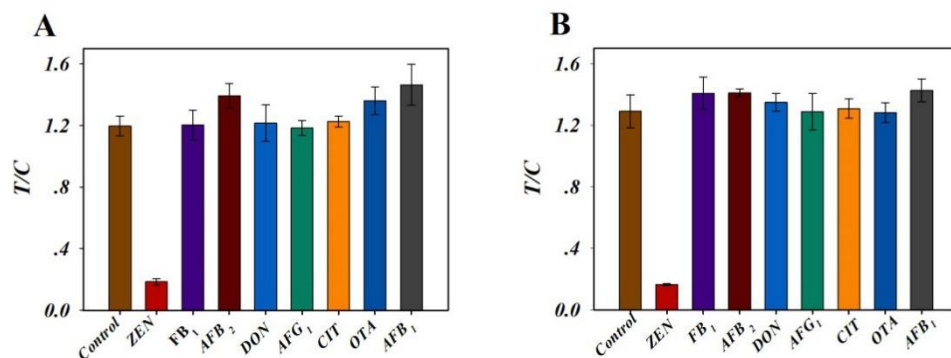

**Fig. S8.** (A) Specificity evaluation of the N-AuNF-Abs based ZEN-LFA strips, in which PB buffer (0.01 M, pH=7, 5% methanol) spiked with various mycotoxins was tested. Samples spiked with 800 ng/mL FB<sub>1</sub>, AFB<sub>2</sub>, DON, AFG<sub>1</sub>, CIT, OTA, and AFB<sub>1</sub> and 80 ng/mL of ZEN were used as the positive control, while blank PB buffer was used as the negative control (B) Specificity evaluation of Tr-AuNF-Abs based ZEN-LFA strips, in which PB buffer (0.01 M, pH=7, 5% methanol) spiked with various mycotoxins was tested. Samples spiked with 1600 ng/mL of FB<sub>1</sub>, AFB<sub>2</sub>, DON, AFG<sub>1</sub>, CIT, OTA, and AFB<sub>1</sub> and 160 ng/mL of ZEN were used as the positive control, while blank PB buffer was used as the negative control.

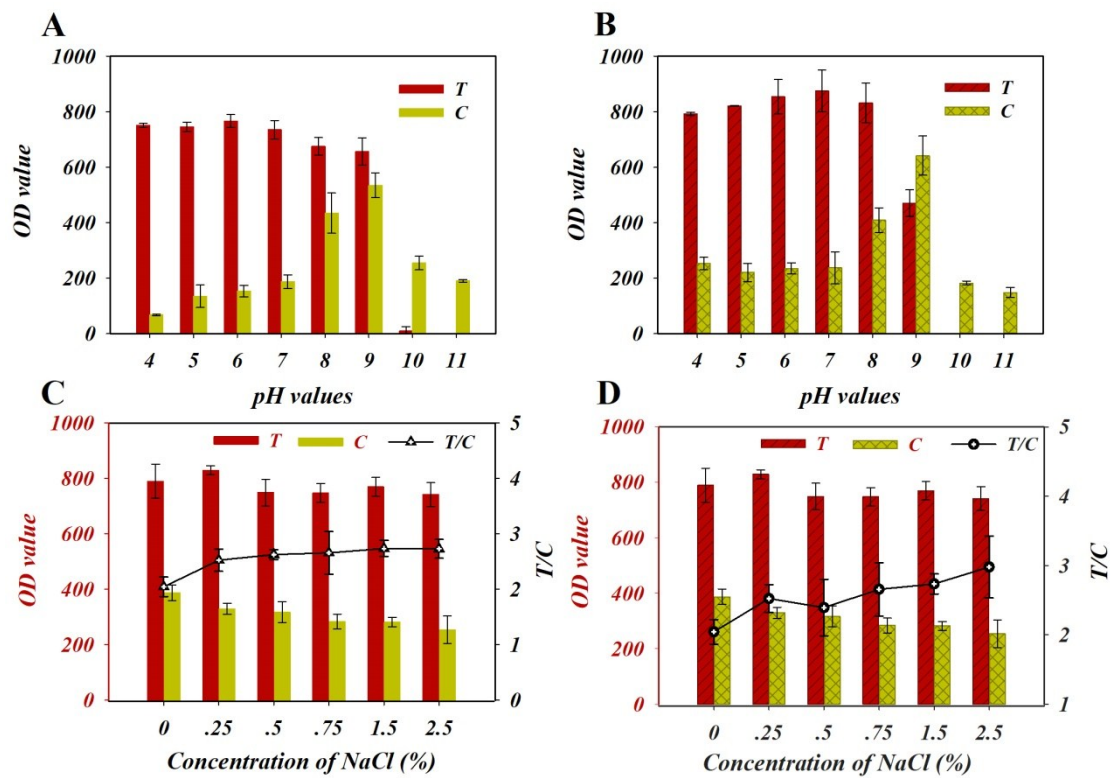

**Fig. S9.** Effects of some common matrix interferents on the N-AuNF-Abs based strip (A, C) and Tr-AuNF-Abs based strip (B, D); different pH values (A, B) and ionic strengths (C, D) were evaluated.

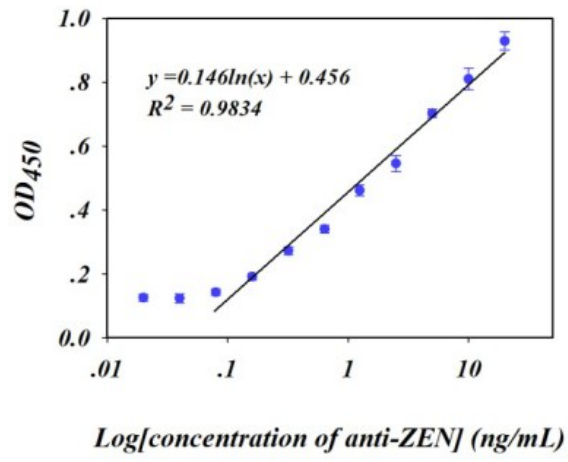

**Fig. S10.** Indirectly ELISA for anti-ZEN antibody determination

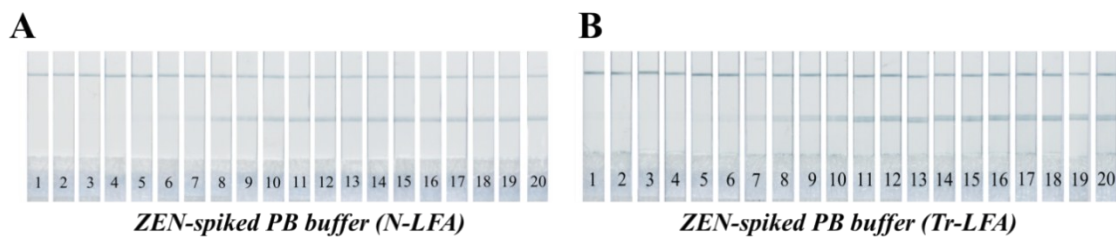

**Fig. S11.** Images of test strip responses to PB buffer. (A) N-AuNF-Abs- and (B) Tr-AuNF-Abs- based strips with ZEN-spiked PB buffer. Samples 1-20 of each group were spiked with different concentrations of ZEN from 0 to 7.5  $\mu\text{g/mL}$  (The corresponding concentrations of 1-20 are 7.5  $\mu\text{g/mL}$ , 5.0  $\mu\text{g/mL}$ , 2.5  $\mu\text{g/mL}$ , 1.25  $\mu\text{g/mL}$ , 625 ng/mL, 313 ng/mL, 156 ng/mL, 78 ng/mL, 39 ng/mL, 20 ng/mL, 9.8 ng/mL, 4.9 ng/mL, 2.45 ng/mL, 1.225 ng/mL, 0.613 ng/mL, 0.3 ng/mL, 0.15 ng/mL, 0.075 ng/mL, 0.038 ng/mL, and 0, respectively).
